# Supplementary material for: Role of glaciers in watershed hydrology: a preliminary study of a "Himalayan catchment"
Source: Copernicus journal article supplement (doi:10.5194/tc-4-115-2010), 2010-02-09
Supplement: Supplementary file 1 [file tc-4-115-2010-supplement.pdf]

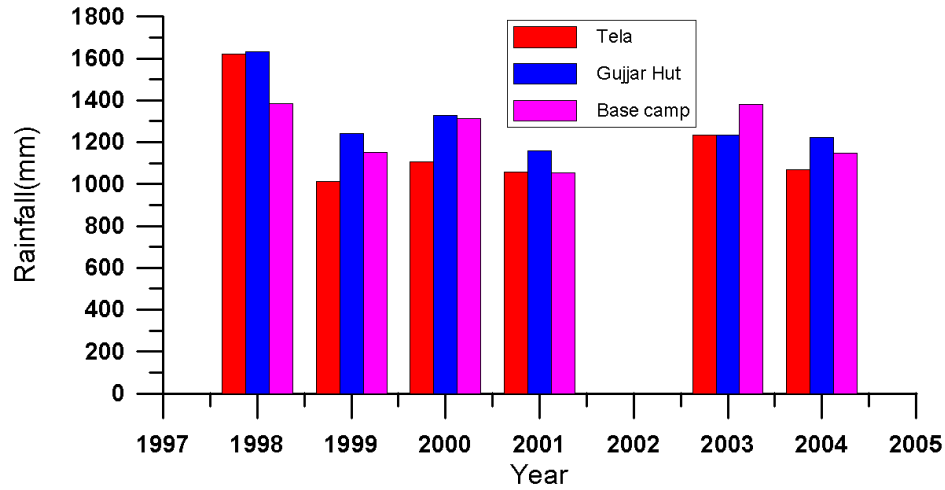

FIGURE-1 VARIATIONS IN MONSOON RAINFALL AT TELA (2540M A.S.L.), GUJJAR HUT(3483M A.S.L.) AND BASE CAMP(3763M A.S.L.) STATIONS DURING THE STUDY PERIOD.

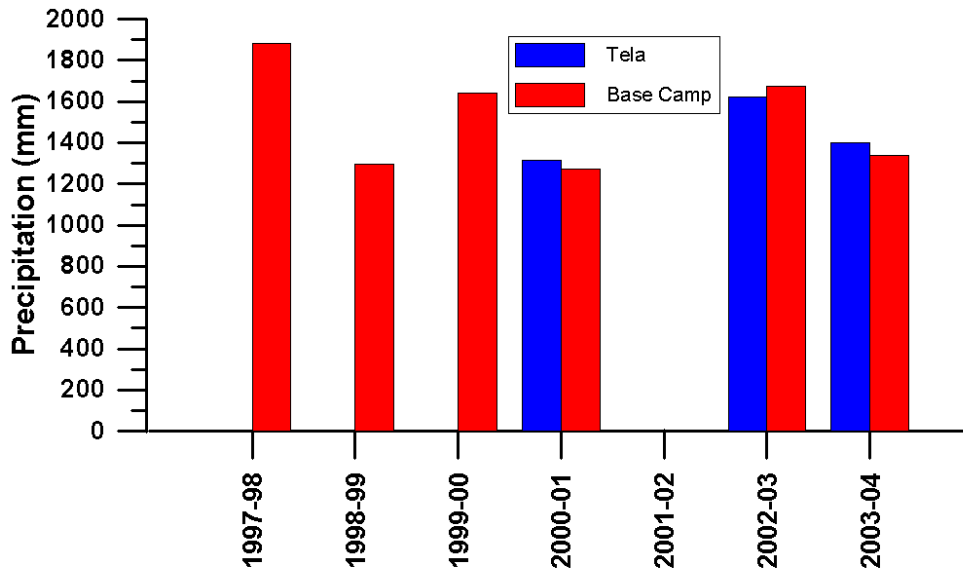

FIGURE-2 VARIATIONS IN ANNUAL PRECIPITATION AT TELA (2540M A.S.L) AND BASE CAMP(3763M A.S.L.) STATIONS DURING THE STUDY PERIOD.
